# Supplementary material for: Analysis of Clinician and Patient Factors and Completion of Telemedicine Appointments Using Video
Source: JAMA Netw Open. 2021 Nov 4;4(11):e2132917. doi: 10.1001/jamanetworkopen.2021.32917 (PMC8569484; doi:10.1001/jamanetworkopen.2021.32917)

## Supplementary Online Content

Crotty BH, Hyun N, Polovneff A, et al. Analysis of clinician and patient factors and completion of telemedicine appointments using video. *JAMA Netw Open*. 2021;4(11):e2132917. doi:10.1001/jamanetworkopen.2021.32917

**eTable.** Multicovariate Mixed Effects Adjusted Odds Ratios

**eFigure 1.** Adjusted Learning Curves for Video Visit Success From Providers and Patients Using the Bernstein Polynomial Spline Coefficients From Analysis 1

**eFigure 2.** Adjusted Learning Curves for Video Visit Success From Providers and Patients Using the Bernstein Polynomial Spline Coefficients From Analysis 2

This supplementary material has been provided by the authors to give readers additional information about their work.

**eTable. Multivariate Mixed Effects Adjusted Odds Ratios (referred to as “Analysis 2” in this text, a subgroup analysis including patients with multiple visits)**

| Characteristic                            | OR1 (95% CI2)     |   | p-value |
|-------------------------------------------|-------------------|---|---------|
| Clinician type                            |                   |   | 0.15    |
| DO/MD/DPM                                 | —                 |   |         |
| APNP/PA/PA-C                              | 0.87 (0.72, 1.05) |   |         |
| Provider comfort with technology          |                   |   | <0.001  |
| Strongly agree                            | —                 |   |         |
| Agree                                     | 0.67 (0.53, 0.85) |   | <0.001  |
| Disagree                                  | 0.16 (0.09, 0.26) |   | <0.001  |
| Neutral                                   | 0.20 (0.14, 0.27) |   | <0.001  |
| Strongly disagree                         | 0.12 (0.05, 0.30) |   | <0.001  |
| Not available                             | 0.29 (0.19, 0.45) |   | <0.001  |
| Patient Age (years)                       |                   |   | <0.001  |
| 18 - 40                                   | —                 |   |         |
| 41 - 65                                   | 0.57 (0.53, 0.61) |   | <0.001  |
| 65 - 80                                   | 0.37 (0.34, 0.41) |   | <0.001  |
| 80+                                       | 0.40 (0.35, 0.46) |   | <0.001  |
| Patient race                              |                   |   | <0.001  |
| White                                     | —                 |   |         |
| American Indian or Alaska Native          | 0.77 (0.52, 1.14) |   | 0.2     |
| Asian                                     | 1.10 (0.89, 1.32) |   | 0.4     |
| Black or African American                 | 0.77 (0.71, 0.84) |   | <0.001  |
| Native Hawaiian or Other Pacific Islander | 0.99 (0.37, 2.62) |   | >0.9    |
| other/unknown/null                        | 0.95 (0.82, 1.11) |   | 0.6     |
| Device used for the visit                 |                   |   | <0.001  |
| Android/iPhone                            | —                 | — |         |
| Laptop or computer                        | 1.55 (1.16, 2.07) |   | 0.003   |

|                                             |                   |        |
|---------------------------------------------|-------------------|--------|
| Other smartphone                            | 0.58 (0.43, 0.78) | <0.001 |
| Tablet                                      | 1.70 (1.21, 2.38) | 0.002  |
| Not available                               | 0.81 (0.53, 1.26) | 0.4    |
| Median income                               |                   | 0.01   |
| \$9500-\$45,000                             | —                 |        |
| \$45,001-\$75,000                           | 1.13 (1.05, 1.22) | 0.004  |
| \$75,001-\$213,000                          | 1.17 (1.06, 1.30) | 0.002  |
| Not available                               | 1.12 (0.91, 1.39) | 0.3    |
| High Speed Internet*                        |                   | 0.87   |
| High                                        | —                 |        |
| Medium                                      | 0.97 (0.90, 1.04) | 0.4    |
| Low                                         | 0.98 (0.89, 1.08) | 0.7    |
| NA                                          | 0.99 (0.80, 1.23) | >0.9   |
| Visit platform                              |                   | <0.001 |
| Integrated platform                         | -                 |        |
| Non-integrated platform                     | 0.61 (0.57, 0.65) |        |
| 1OR = Odds Ratio, 2CI = Confidence Interval |                   |        |

\* Residential fixed high speed connections derived from Federal Communications Commission data. High denotes >800 connections capable of at least 10 Mbps download speeds and 1 Mbps upload / 1,000 households; medium 601-800 connections / 1,000 households, and low ≤600 connections / 1,000 households.

**eFigure 1. Adjusted Learning Curves for Video Visit Success From Providers and Patients Using the Bernstein Polynomial Spline Coefficients From Analysis 1**

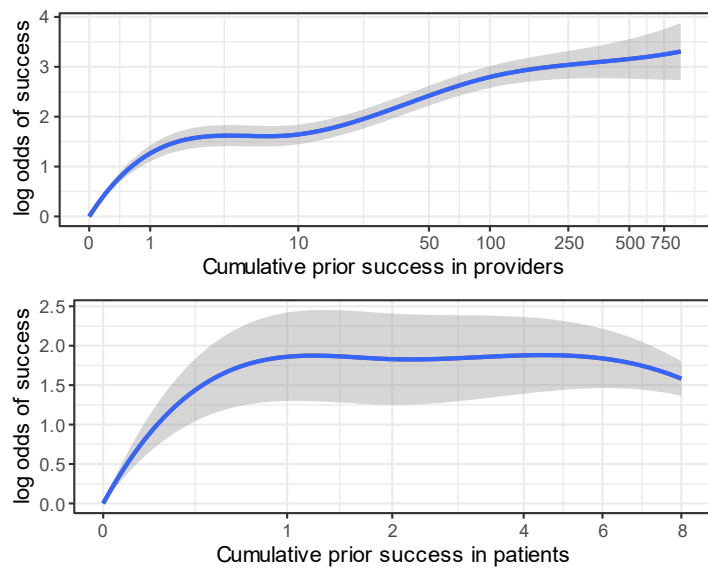

**eFigure 2. Adjusted Learning Curves for Video Visit Success From Providers and Patients Using the Bernstein Polynomial Spline Coefficients From Analysis 2**

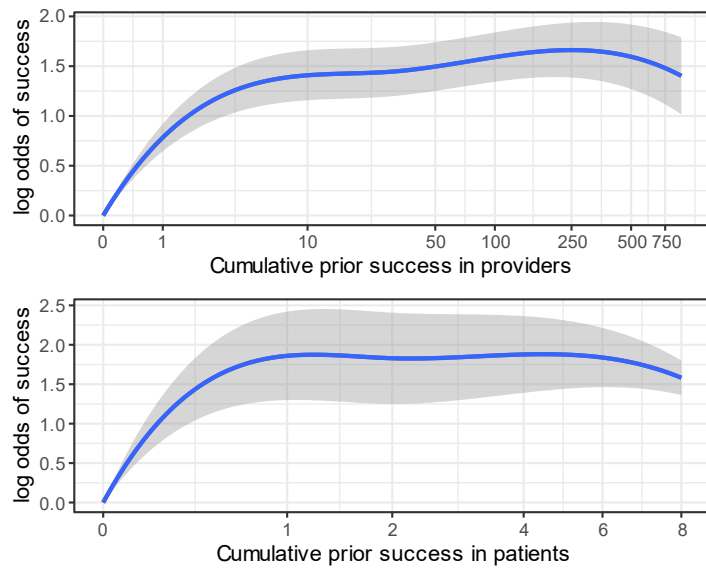

Supplement: Supplement. — eTable. Multicovariate Mixed Effects Adjusted Odds Ratios eFigure 1. Adjusted Learning Curves for Video Visit Success From Providers and Patients Using the Bernstein Polynomial Spline Coefficients From Analysis 1 eFigure 2. Adjusted Learning Curves for Video Visit Success From Providers and Patients Using the Bernstein Polynomial Spline Coefficients From Analysis 2 [file jamanetwopen-e2132917-s001.pdf]
